# Supplementary material
Source: MDPI journal article supplement (https://www.mdpi.com/2072-4292/6/7/6064)

*Supplementary Information*

## **Mangrove Species Identification: Comparing WorldView-2 with Aerial Photographs. *Remote Sensing*, 2014, 6, 6064–6088**

**Muditha K. Heenkenda <sup>1,\*</sup>, Karen E. Joyce <sup>1</sup>, Stefan W. Maier <sup>1</sup> and Renee Bartolo <sup>2</sup>**

<sup>1</sup> Research Institute for the Environment and Livelihoods, Charles Darwin University, Ellengowan Drive, Casuarina, NT 0909, Australia; E-Mails: karen.joyce@cdu.edu.au (K.E.J.); stefan.maier@cdu.edu.au (S.W.M.)

<sup>2</sup> Environmental Research Institute of the Supervising Scientist, Department of the Environment, G.P.O. Box 461, Darwin, NT 0801, Australia; E-Mail: renee.bartolo@environment.gov.au

\* Author to whom correspondence should be addressed;  
E-Mail: mudithakumari.heenkenda@cdu.edu.au; Tel.: +61-8-8946-7331.

---

**Figure S1.** Separating mangrove coverage from WV2 image—WorkFlow.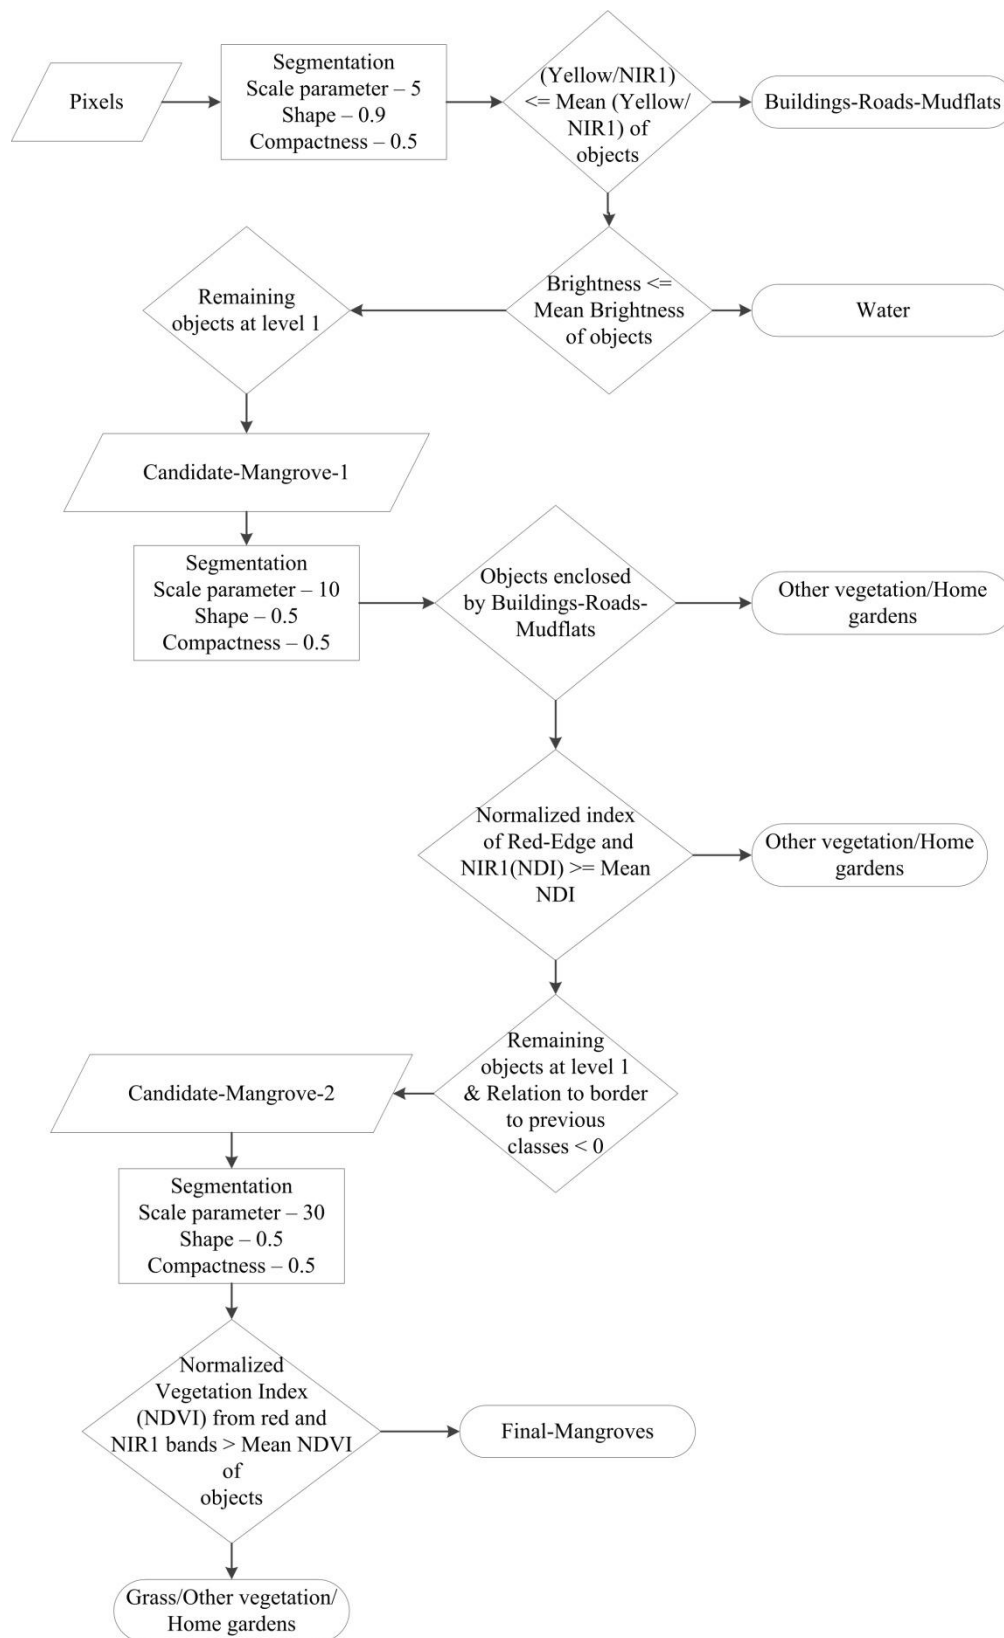

**Figure S2.** Separating mangrove coverage from aerial photographs—Workflow.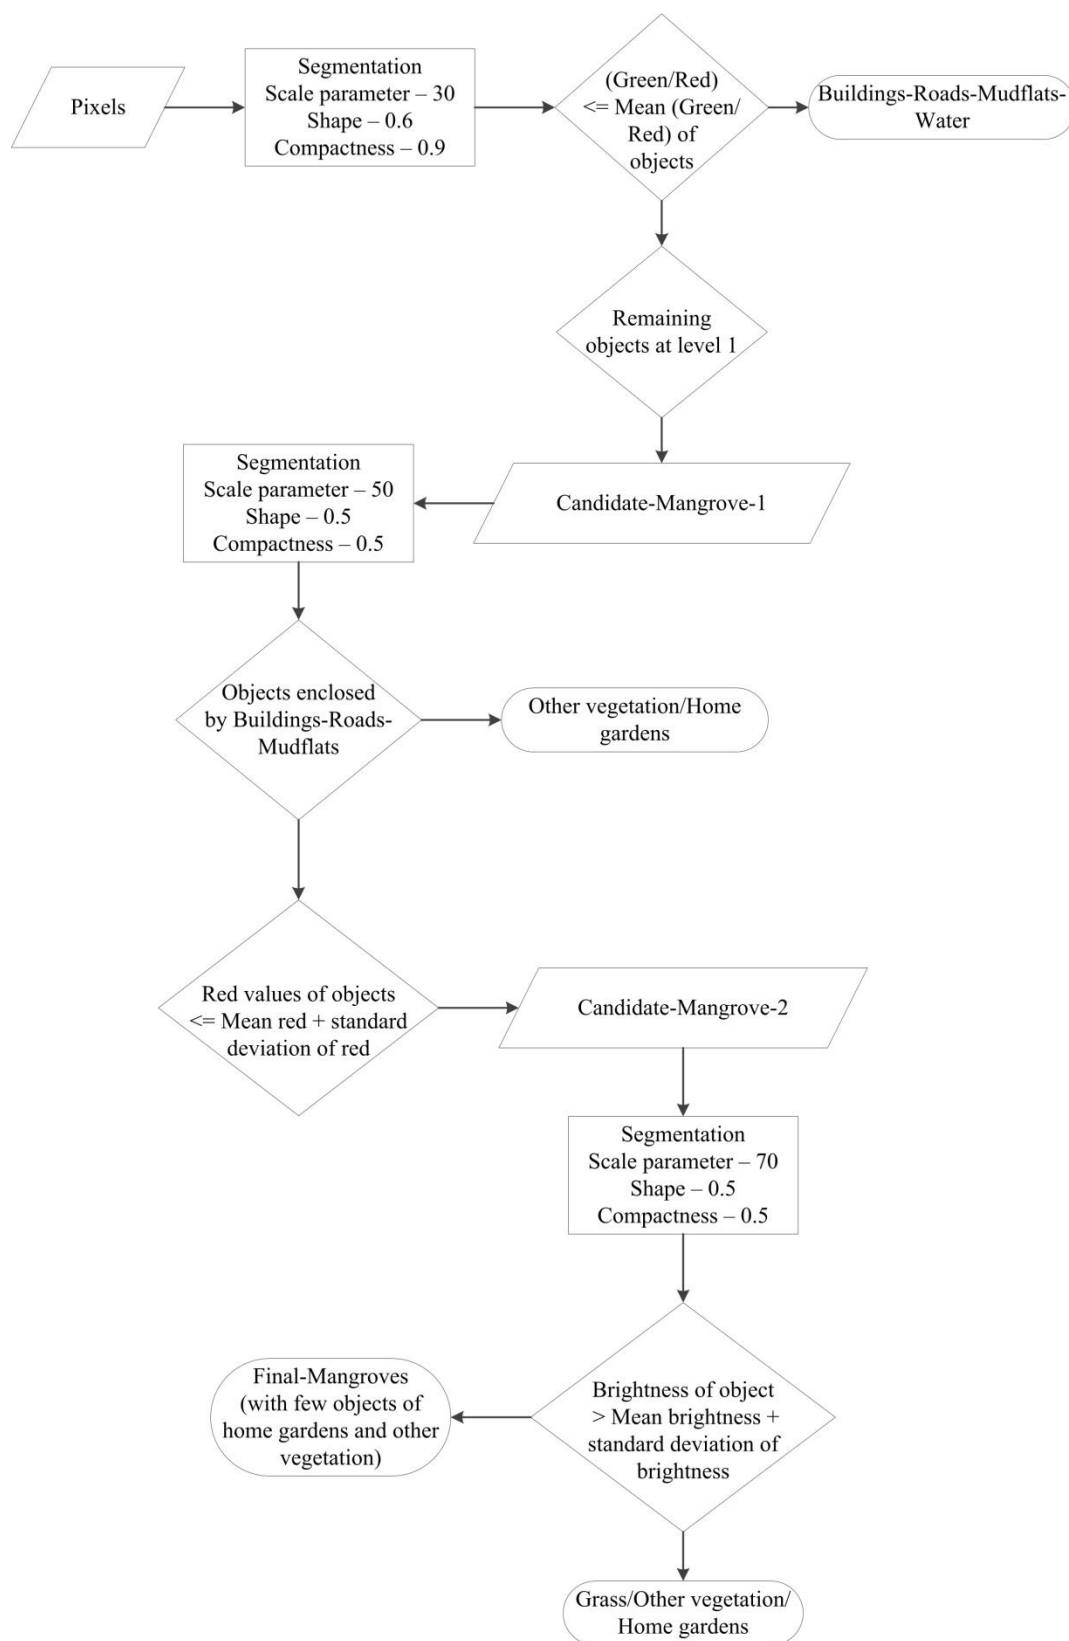

Supplement: s1 [file s1]
